# Supplementary material for: Treatment of Progressive Multifocal Leukoencephalopathy Associated with Natalizumab
Source: Atypon-hosted journal article supplement (doi:10.1056/nejmoa0810257), 2009-09-09

## Supplementary Appendix

This appendix has been provided by the authors to give readers additional information about their work.

Supplement to: Wenning W, Haghikia A, Laubenberger J, et al. Treatment of progressive multifocal leukoencephalopathy associated with natalizumab. *N Engl J Med* 2009;361:1075-80.

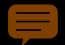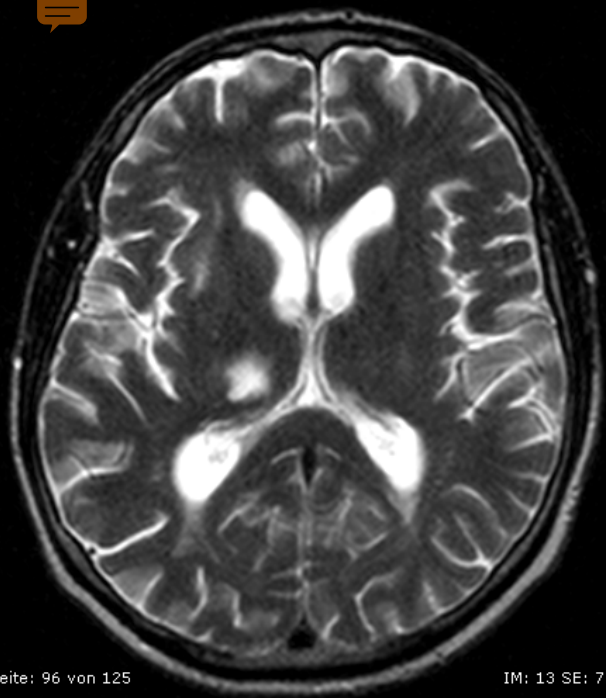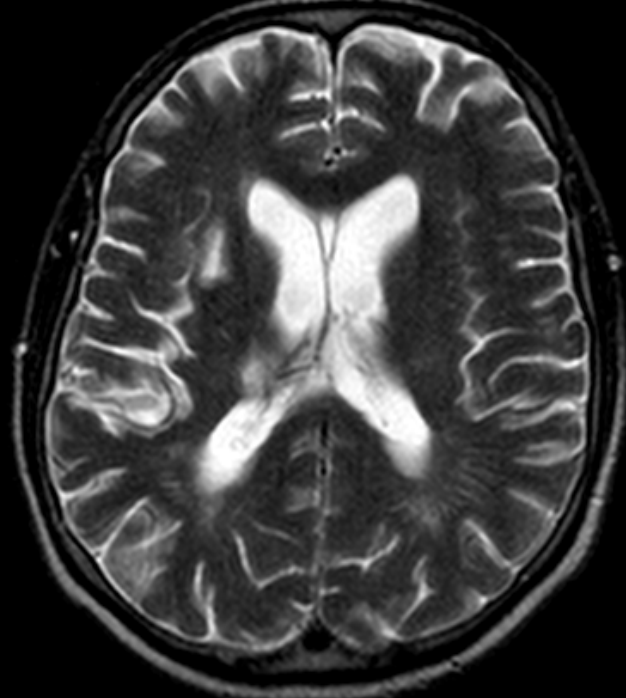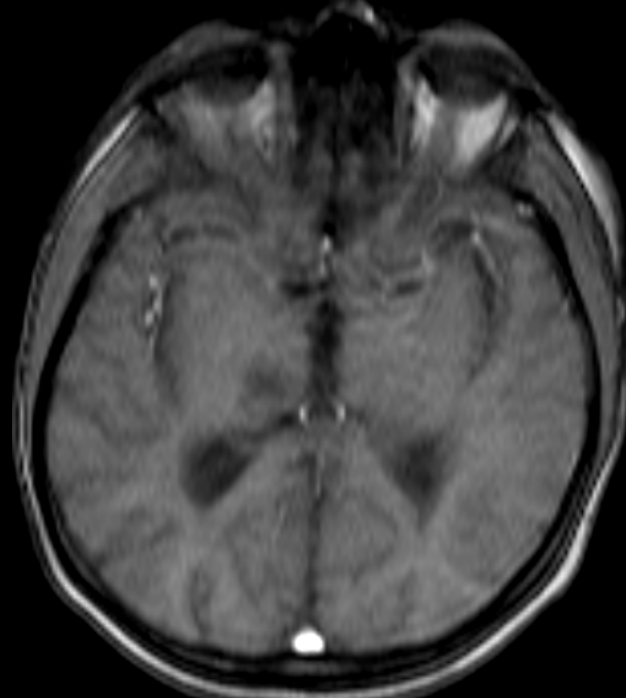

Seite: 96 von 125

IM: 13 SE: 7

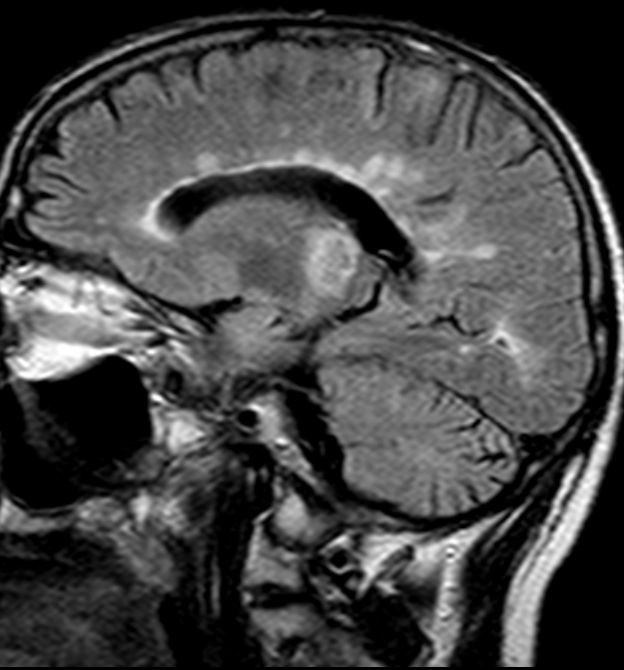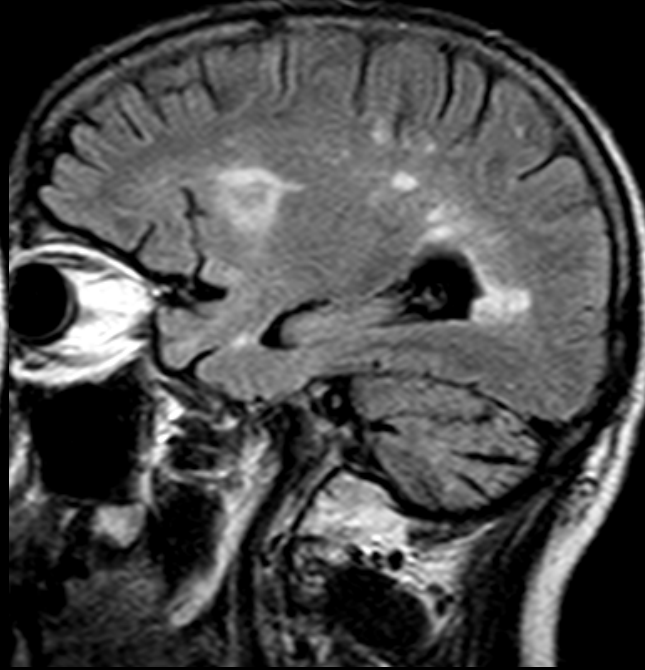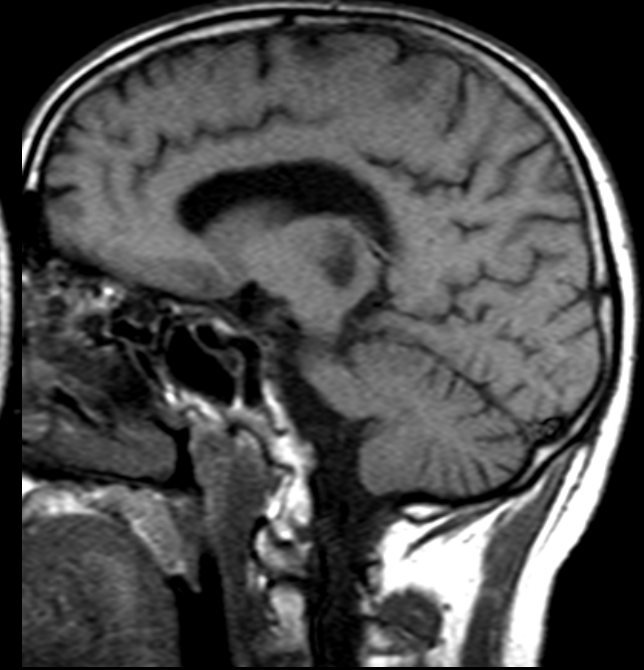

Supplement: nejm_wenning_1075sa1.pdf [file nejm_wenning_1075sa1.pdf]
